# Supplementary material for: Gene expression of transporters and phase I/II metabolic enzymes in murine small intestine during fasting
Source: PubMed Central journal article supplement (PMC1971072; doi:10.1186/1471-2164-8-267), 2007-08-07
Supplement: 1471-2164-8-267-S1.pdf [file 1471-2164-8-267-S1.pdf]

| Gene Symbol | Probe set ID | Expression signal normal fed mice | Expression signal 24h fasted mice | Fold change | P-value | Gene name                                                                                   |
|-------------|--------------|-----------------------------------|-----------------------------------|-------------|---------|---------------------------------------------------------------------------------------------|
| <b>Slc1</b> |              |                                   |                                   |             |         |                                                                                             |
| Slc1a1      | 1425415_a_at | 6.527                             | 6.268                             | 0.836       | 0.1199  | solute carrier family 1 (neuronal/epithelial high affinity glutamate transporter), member 1 |
| Slc1a1      | 1448299_at   | 6.640                             | 6.508                             | 0.912       | 0.2785  | solute carrier family 1 (neuronal/epithelial high affinity glutamate transporter), member 1 |
| Slc1a1      | 1460386_a_at | 4.671                             | 4.372                             | 0.813       | 0.2138  | solute carrier family 1 (neuronal/epithelial high affinity glutamate transporter), member 1 |
| Slc1a2      | 1451627_a_at | 1.866                             | 1.944                             | 1.060       | 0.3715  | solute carrier family 1 (glial high affinity glutamate transporter), member 2               |
| Slc1a3      | 1426340_at   | 2.624                             | 2.586                             | 0.974       | 0.7046  | solute carrier family 1 (glial high affinity glutamate transporter), member 3               |
| Slc1a3      | 1426341_at   | 1.912                             | 1.984                             | 1.050       | 0.5286  | solute carrier family 1 (glial high affinity glutamate transporter), member 3               |
| Slc1a3      | 1452031_at   | 2.575                             | 2.679                             | 1.080       | 0.5221  | solute carrier family 1 (glial high affinity glutamate transporter), member 3               |
| Slc1a4      | 1423549_at   | 2.067                             | 1.916                             | 0.901       | 0.1471  | solute carrier family 1 (glutamate/neutral amino acid transporter), member 4                |
| Slc1a4      | 1423550_at   | 3.071                             | 2.693                             | 0.769       | 0.0128  | solute carrier family 1 (glutamate/neutral amino acid transporter), member 4                |
| Slc1a4      | 1456003_a_at | 3.966                             | 3.912                             | 0.963       | 0.6459  | solute carrier family 1 (glutamate/neutral amino acid transporter), member 4                |
| Slc1a5      | 1416629_at   | 3.849                             | 3.577                             | 0.828       | 0.0285  | solute carrier family 1 (neutral amino acid transporter), member 5                          |
| Slc1a6      | 1418933_at   | 2.021                             | 2.117                             | 1.070       | 0.3124  | solute carrier family 1 (high affinity aspartate/glutamate transporter), member 6           |
| <b>Slc2</b> |              |                                   |                                   |             |         |                                                                                             |
| Slc2a1      | 1426599_a_at | 4.898                             | 4.806                             | 0.938       | 0.5232  | solute carrier family 2 (facilitated glucose transporter), member 1                         |
| Slc2a1      | 1426600_at   | 3.471                             | 3.239                             | 0.852       | 0.0605  | solute carrier family 2 (facilitated glucose transporter), member 1                         |
| Slc2a1      | 1434773_a_at | 5.318                             | 5.123                             | 0.873       | 0.2519  | solute carrier family 2 (facilitated glucose transporter), member 1                         |
| Slc2a2      | 1449067_at   | 9.868                             | 9.948                             | 1.060       | 0.6155  | solute carrier family 2 (facilitated glucose transporter), member 2                         |
| Slc2a3      | 1421924_at   | 1.913                             | 2.080                             | 1.120       | 0.2696  | solute carrier family 2 (facilitated glucose transporter), member 3                         |
| Slc2a3      | 1427770_a_at | 1.818                             | 1.824                             | 1.000       | 0.9586  | solute carrier family 2 (facilitated glucose transporter), member 3                         |
| Slc2a3      | 1437052_s_at | 2.710                             | 2.759                             | 1.030       | 0.7785  | solute carrier family 2 (facilitated glucose transporter), member 3                         |
| Slc2a3      | 1455898_x_at | 2.524                             | 2.569                             | 1.030       | 0.6609  | solute carrier family 2 (facilitated glucose transporter), member 3                         |
| Slc2a4      | 1415958_at   | 3.182                             | 2.900                             | 0.822       | 0.0119  | solute carrier family 2 (facilitated glucose transporter), member 4                         |
| Slc2a4      | 1415959_at   | 2.063                             | 1.768                             | 0.815       | 0.0103  | solute carrier family 2 (facilitated glucose transporter), member 4                         |
| Slc2a5      | 1416639_at   | 8.368                             | 8.700                             | 1.260       | 0.2334  | solute carrier family 2 (facilitated glucose transporter), member 5                         |
| Slc2a8      | 1450628_at   | 3.136                             | 3.195                             | 1.040       | 0.6003  | solute carrier family 2, (facilitated glucose transporter), member 8                        |
| Slc2a9      | 1426568_at   | 4.067                             | 4.151                             | 1.060       | 0.4369  | solute carrier family 2 (facilitated glucose transporter), member 9                         |
| Slc2a10     | 1419434_at   | 2.547                             | 2.631                             | 1.060       | 0.5784  | solute carrier family 2 (facilitated glucose transporter), member 10                        |
| Slc2a10     | 1449477_s_at | 2.554                             | 2.407                             | 0.903       | 0.2329  | solute carrier family 2 (facilitated glucose transporter), member 10                        |
| <b>Slc3</b> |              |                                   |                                   |             |         |                                                                                             |
| Slc3a1      | 1448741_at   | 9.371                             | 9.408                             | 1.030       | 0.7365  | solute carrier family 3, member 1                                                           |
| Slc3a2      | 1425364_a_at | 9.933                             | 10.082                            | 1.110       | 0.1406  | solute carrier family 3 (activators of dibasic and neutral amino acid transport), member 2  |

| Gene Symbol | Probe set ID | Expression signal 0h | Expression signal 24h | Fold change | P-value | Gene name                                                                      |
|-------------|--------------|----------------------|-----------------------|-------------|---------|--------------------------------------------------------------------------------|
| <b>Slc4</b> |              |                      |                       |             |         |                                                                                |
| Slc4a1      | 1416464_at   | 3.332                | 3.318                 | 0.990       | 0.9142  | solute carrier family 4 (anion exchanger), member 1                            |
| Slc4a1      | 1431743_a_at | 1.917                | 1.937                 | 1.010       | 0.8208  | solute carrier family 4 (anion exchanger), member 1                            |
| Slc4a1      | 1434502_x_at | 3.180                | 3.113                 | 0.955       | 0.6510  | solute carrier family 4 (anion exchanger), member 1                            |
| Slc4a1ap    | 1437758_a_at | 3.471                | 3.433                 | 0.974       | 0.7590  | solute carrier family 4 (anion exchanger), member 1, adaptor protein           |
| Slc4a2      | 1416637_at   | 6.012                | 5.815                 | 0.872       | 0.2008  | solute carrier family 4 (anion exchanger), member 2                            |
| Slc4a3      | 1418485_at   | 2.106                | 1.893                 | 0.863       | 0.0403  | solute carrier family 4 (anion exchanger), member 3                            |
| Slc4a4      | 1421225_a_at | 5.657                | 5.894                 | 1.180       | 0.1337  | solute carrier family 4 (anion exchanger), member 4                            |
| Slc4a4      | 1426432_a_at | 4.503                | 4.752                 | 1.190       | 0.0781  | solute carrier family 4 (anion exchanger), member 4                            |
| Slc4a4      | 1450169_at   | 1.788                | 1.823                 | 1.020       | 0.7131  | solute carrier family 4 (anion exchanger), member 4                            |
| Slc4a4      | 1452071_at   | 7.518                | 7.743                 | 1.170       | 0.0629  | solute carrier family 4 (anion exchanger), member 4                            |
| Slc4a7      | 1438673_at   | 9.538                | 9.563                 | 1.020       | 0.8956  | solute carrier family 4, sodium bicarbonate cotransporter, member 7            |
| Slc4a8      | 1419851_at   | 2.898                | 2.885                 | 0.991       | 0.9055  | solute carrier family 4 (anion exchanger), member 8                            |
| Slc4a8      | 1423443_at   | 2.004                | 2.025                 | 1.020       | 0.8567  | solute carrier family 4 (anion exchanger), member 8                            |
| Slc4a10     | 1417672_at   | 1.963                | 1.718                 | 0.844       | 0.0890  | solute carrier family 4, sodium bicarbonate cotransporter-like, member 10      |
| <b>Slc5</b> |              |                      |                       |             |         |                                                                                |
| Slc5a1      | 1419057_at   | 11.626               | 11.857                | 1.170       | 0.0816  | solute carrier family 5 (sodium/glucose cotransporter), member 1               |
| Slc5a1      | 1455431_at   | 10.489               | 10.856                | 1.290       | 0.0697  | solute carrier family 5 (sodium/glucose cotransporter), member 1               |
| Slc5a2      | 1419166_at   | 5.819                | 5.644                 | 0.886       | 0.3336  | solute carrier family 5 (sodium/glucose cotransporter), member 2               |
| Slc5a2      | 1455005_s_at | 3.170                | 3.098                 | 0.951       | 0.4392  | solute carrier family 5 (sodium/glucose cotransporter), member 2               |
| Slc5a3      | 1422170_at   | 2.227                | 2.120                 | 0.929       | 0.3283  | solute carrier family 5 (inositol transporters), member 3                      |
| Slc5a4a     | 1421637_at   | 6.416                | 5.979                 | 0.739       | 0.1692  | solute carrier family 5, member 4a                                             |
| Slc5a4b     | 1422757_at   | 9.733                | 9.459                 | 0.827       | 0.2622  | solute carrier family 5 (neutral amino acid transporters, system A), member 4b |
| Slc5a5      | 1422113_at   | 2.423                | 2.460                 | 1.030       | 0.7198  | solute carrier family 5 (sodium iodide symporter), member 5                    |
| Slc5a6      | 1435860_at   | 5.030                | 4.682                 | 0.786       | 0.0266  | solute carrier family 5 (sodium-dependent vitamin transporter), member 6       |
| Slc5a7      | 1421428_at   | 1.811                | 1.683                 | 0.915       | 0.2347  | solute carrier family 5 (choline transporter), member 7                        |
| Slc5a8      | 1425606_at   | 6.221                | 6.756                 | 1.450       | 0.0009  | solute carrier family 5 (iodide transporter), member 8                         |
| Slc5a9      | 1426634_at   | 4.118                | 4.037                 | 0.945       | 0.5437  | solute carrier family 5 (sodium/glucose cotransporter), member 9               |
| Slc5a9      | 1452136_at   | 4.000                | 3.754                 | 0.843       | 0.0458  | solute carrier family 5 (sodium/glucose cotransporter), member 9               |
| Slc5a11     | 1428752_at   | 6.003                | 5.897                 | 0.929       | 0.5533  | solute carrier family 5 (sodium/glucose cotransporter), member 11              |
| <b>Slc6</b> |              |                      |                       |             |         |                                                                                |
| Slc6a1      | 1452142_at   | 2.428                | 2.399                 | 0.980       | 0.7795  | solute carrier family 6 (neurotransmitter transporter, GABA), member 1         |
| Slc6a2      | 1421641_at   | 2.332                | 2.289                 | 0.971       | 0.6980  | solute carrier family 6 (neurotransmitter transporter, noradrenalin), member 2 |
| Slc6a3      | 1417415_at   | 3.065                | 3.271                 | 1.150       | 0.1910  | solute carrier family 6 (neurotransmitter transporter, dopamine), member 3     |

| Gene Symbol | Probe set ID | Expression signal 0h | Expression signal 24h | Fold change | P-value | Gene name                                                                       |
|-------------|--------------|----------------------|-----------------------|-------------|---------|---------------------------------------------------------------------------------|
| Slc6a4      | 1417150_at   | 8.237                | 8.755                 | 1.430       | 0.0014  | solute carrier family 6 (neurotransmitter transporter, serotonin), member 4     |
| Slc6a5      | 1425992_at   | 2.387                | 2.423                 | 1.020       | 0.7212  | solute carrier family 6 (neurotransmitter transporter, glycine), member 5       |
| Slc6a6      | 1420148_at   | 3.380                | 3.423                 | 1.030       | 0.6185  | solute carrier family 6 (neurotransmitter transporter, taurine), member 6       |
| Slc6a6      | 1421346_a_at | 4.860                | 5.203                 | 1.270       | 0.0192  | solute carrier family 6 (neurotransmitter transporter, taurine), member 6       |
| Slc6a6      | 1449751_at   | 2.955                | 2.882                 | 0.951       | 0.5225  | solute carrier family 6 (neurotransmitter transporter, taurine), member 6       |
| Slc6a8      | 1417116_at   | 10.264               | 10.549                | 1.220       | 0.0165  | solute carrier family 6 (neurotransmitter transporter, creatine), member 8      |
| Slc6a8      | 1448596_at   | 10.030               | 10.184                | 1.110       | 0.1694  | solute carrier family 6 (neurotransmitter transporter, creatine), member 8      |
| Slc6a9      | 1417636_at   | 3.568                | 3.551                 | 0.988       | 0.8975  | solute carrier family 6 (neurotransmitter transporter, glycine), member 9       |
| Slc6a9      | 1431812_a_at | 2.772                | 2.742                 | 0.980       | 0.7497  | solute carrier family 6 (neurotransmitter transporter, glycine), member 9       |
| Slc6a12     | 1449382_at   | 2.078                | 2.041                 | 0.974       | 0.8119  | solute carrier family 6 (neurotransmitter transporter, betaine/GABA), member 12 |
| Slc6a13     | 1424338_at   | 1.769                | 1.894                 | 1.090       | 0.2906  | solute carrier family 6 (neurotransmitter transporter, GABA), member 13         |
| Slc6a14     | 1420503_at   | 3.000                | 2.989                 | 0.992       | 0.9170  | solute carrier family 6 (neurotransmitter transporter), member 14               |
| Slc6a14     | 1420504_at   | 2.787                | 2.814                 | 1.020       | 0.8944  | solute carrier family 6 (neurotransmitter transporter), member 14               |
| Slc6a15     | 1426712_at   | 2.559                | 2.690                 | 1.100       | 0.1974  | solute carrier family 6 (neurotransmitter transporter), member 15               |
| Slc6a17     | 1436137_at   | 2.450                | 2.504                 | 1.040       | 0.6036  | solute carrier family 6 (neurotransmitter transporter), member 17               |
| Slc6a18     | 1451879_a_at | 2.846                | 3.114                 | 1.200       | 0.0339  | solute carrier family 6 (neurotransmitter transporter), member 18               |
| Slc6a20     | 1422899_at   | 2.104                | 2.047                 | 0.961       | 0.5742  | solute carrier family 6 (neurotransmitter transporter), member 20               |
| <b>Slc7</b> |              |                      |                       |             |         |                                                                                 |
| Slc7a1      | 1421533_at   | 2.178                | 2.087                 | 0.939       | 0.4081  | solute carrier family 7 (cationic amino acid transporter, y+ system), member 1  |
| Slc7a2      | 1422648_at   | 2.220                | 2.178                 | 0.971       | 0.6983  | solute carrier family 7 (cationic amino acid transporter, y+ system), member 2  |
| Slc7a2      | 1426008_a_at | 2.101                | 1.958                 | 0.906       | 0.1795  | solute carrier family 7 (cationic amino acid transporter, y+ system), member 2  |
| Slc7a2      | 1450703_at   | 2.669                | 2.569                 | 0.933       | 0.3374  | solute carrier family 7 (cationic amino acid transporter, y+ system), member 2  |
| Slc7a3      | 1417022_at   | 1.697                | 1.759                 | 1.040       | 0.5518  | solute carrier family 7 (cationic amino acid transporter, y+ system), member 3  |
| Slc7a4      | 1426068_at   | 2.240                | 2.079                 | 0.894       | 0.1550  | solute carrier family 7 (cationic amino acid transporter, y+ system), member 4  |
| Slc7a4      | 1426069_s_at | 2.583                | 2.555                 | 0.981       | 0.7852  | solute carrier family 7 (cationic amino acid transporter, y+ system), member 4  |
| Slc7a4      | 1436776_x_at | 2.681                | 2.724                 | 1.030       | 0.7821  | solute carrier family 7 (cationic amino acid transporter, y+ system), member 4  |
| Slc7a5      | 1418326_at   | 3.266                | 3.283                 | 1.010       | 0.8482  | solute carrier family 7 (cationic amino acid transporter, y+ system), member 5  |
| Slc7a6      | 1433467_at   | 2.713                | 2.586                 | 0.916       | 0.3237  | solute carrier family 7 (cationic amino acid transporter, y+ system), member 6  |
| Slc7a6      | 1460541_at   | 2.624                | 2.618                 | 0.996       | 0.9478  | solute carrier family 7 (cationic amino acid transporter, y+ system), member 6  |
| Slc7a7      | 1417392_a_at | 9.628                | 9.993                 | 1.290       | 0.0083  | solute carrier family 7 (cationic amino acid transporter, y+ system), member 7  |
| Slc7a8      | 1417929_at   | 5.701                | 5.817                 | 1.080       | 0.4508  | solute carrier family 7 (cationic amino acid transporter, y+ system), member 8  |
| Slc7a9      | 1448783_at   | 10.394               | 10.534                | 1.100       | 0.1627  | solute carrier family 7 (cationic amino acid transporter, y+ system), member 9  |
| Slc7a10     | 1421093_at   | 1.856                | 1.801                 | 0.963       | 0.5671  | solute carrier family 7 (cationic amino acid transporter, y+ system), member 10 |
| Slc7a11     | 1420413_at   | 2.088                | 1.953                 | 0.911       | 0.2156  | solute carrier family 7 (cationic amino acid transporter, y+ system), member 11 |

| Gene Symbol  | Probe set ID | Expression signal 0h | Expression signal 24h | Fold change | P-value | Gene name                                                                           |
|--------------|--------------|----------------------|-----------------------|-------------|---------|-------------------------------------------------------------------------------------|
| Slc7a12      | 1419579_at   | 1.680                | 1.703                 | 1.020       | 0.8176  | solute carrier family 7 (cationic amino acid transporter, y+ system), member 12     |
| Slc7a13      | 1431740_at   | 2.034                | 1.967                 | 0.954       | 0.4834  | solute carrier family 7, (cationic amino acid transporter, y+ system) member 13     |
| Slc7a13      | 1449301_at   | 2.348                | 2.338                 | 0.993       | 0.9260  | solute carrier family 7, (cationic amino acid transporter, y+ system) member 13     |
| <b>Slc8</b>  |              |                      |                       |             |         |                                                                                     |
| Slc8a1       | 1425817_a_at | 2.480                | 2.443                 | 0.975       | 0.7383  | solute carrier family 8 (sodium/calcium exchanger), member 1                        |
| Slc8a2       | 1428054_at   | 2.014                | 2.029                 | 1.010       | 0.8773  | solute carrier family 8 (sodium/calcium exchanger), member 2                        |
| Slc8a3       | 1450311_at   | 1.676                | 1.661                 | 0.989       | 0.8720  | solute carrier family 8 (sodium/calcium exchanger), member 3                        |
| <b>Slc9</b>  |              |                      |                       |             |         |                                                                                     |
| Slc9a1       | 1417397_at   | 6.476                | 6.187                 | 0.818       | 0.0291  | solute carrier family 9 (sodium/hydrogen exchanger), member 1                       |
| Slc9a3r1     | 1438115_a_at | 10.613               | 10.356                | 0.837       | 0.0876  | solute carrier family 9 (sodium/hydrogen exchanger), isoform 3 regulator 1          |
| Slc9a3r1     | 1438116_x_at | 10.624               | 10.517                | 0.928       | 0.2801  | solute carrier family 9 (sodium/hydrogen exchanger), isoform 3 regulator 1          |
| Slc9a3r1     | 1450982_at   | 10.868               | 10.799                | 0.954       | 0.5759  | solute carrier family 9 (sodium/hydrogen exchanger), isoform 3 regulator 1          |
| Slc9a3r2     | 1428954_at   | 3.329                | 3.125                 | 0.868       | 0.0867  | solute carrier family 9 (sodium/hydrogen exchanger), isoform 3 regulator 2          |
| Slc9a3r2     | 1428955_x_at | 3.172                | 3.159                 | 0.991       | 0.8868  | solute carrier family 9 (sodium/hydrogen exchanger), isoform 3 regulator 2          |
| Slc9a3r2     | 1431208_a_at | 3.063                | 2.986                 | 0.948       | 0.4057  | solute carrier family 9 (sodium/hydrogen exchanger), isoform 3 regulator 2          |
| Slc9a3r2     | 1439368_a_at | 3.654                | 3.351                 | 0.811       | 0.0229  | solute carrier family 9 (sodium/hydrogen exchanger), isoform 3 regulator 2          |
| Slc9a3r2     | 1439369_x_at | 2.612                | 2.436                 | 0.885       | 0.0650  | solute carrier family 9 (sodium/hydrogen exchanger), isoform 3 regulator 2          |
| Slc9a3r2     | 1452976_a_at | 2.182                | 2.111                 | 0.952       | 0.4551  | solute carrier family 9 (sodium/hydrogen exchanger), isoform 3 regulator 2          |
| Slc9a8       | 1426274_at   | 3.980                | 4.059                 | 1.060       | 0.4652  | solute carrier family 9 (sodium/hydrogen exchanger), member 8                       |
| Slc9a8       | 1454865_at   | 3.073                | 3.166                 | 1.070       | 0.5040  | solute carrier family 9 (sodium/hydrogen exchanger), member 8                       |
| <b>Slc10</b> |              |                      |                       |             |         |                                                                                     |
| Slc10a1      | 1424898_at   | 2.345                | 2.369                 | 1.020       | 0.8358  | solute carrier family 10 (sodium/bile acid cotransporter family), member 1          |
| Slc10a1      | 1450261_a_at | 1.552                | 1.570                 | 1.010       | 0.8493  | solute carrier family 10 (sodium/bile acid cotransporter family), member 1          |
| Slc10a2      | 1450245_at   | 4.692                | 4.765                 | 1.050       | 0.5680  | solute carrier family 10, member 2                                                  |
| Slc10a3      | 1451227_a_at | 4.263                | 4.294                 | 1.020       | 0.7832  | solute carrier family 10 (sodium/bile acid cotransporter family), member 3          |
| Slc10a6      | 1428776_at   | 2.562                | 2.531                 | 0.979       | 0.7912  | solute carrier family 10 (sodium/bile acid cotransporter family), member 6          |
| <b>Slc11</b> |              |                      |                       |             |         |                                                                                     |
| Slc11a1      | 1420361_at   | 3.680                | 3.391                 | 0.818       | 0.1043  | solute carrier family 11 (proton-coupled divalent metal ion transporters), member 1 |
| Slc11a2      | 1417584_at   | 3.618                | 3.665                 | 1.030       | 0.6520  | solute carrier family 11 (proton-coupled divalent metal ion transporters), member 2 |
| Slc11a2      | 1426441_at   | 4.862                | 4.468                 | 0.761       | 0.0962  | solute carrier family 11 (proton-coupled divalent metal ion transporters), member 2 |
| Slc11a2      | 1452078_a_at | 4.912                | 4.597                 | 0.804       | 0.0825  | solute carrier family 11 (proton-coupled divalent metal ion transporters), member 2 |
| <b>Slc12</b> |              |                      |                       |             |         |                                                                                     |
| Slc12a1      | 1421390_at   | 2.864                | 2.890                 | 1.020       | 0.8538  | solute carrier family 12, member 1                                                  |
| Slc12a1      | 1424260_at   | 2.211                | 2.159                 | 0.964       | 0.6157  | solute carrier family 12, member 1                                                  |

| Gene<br>Symbol | Probe set ID | Expression<br>signal 0h | Expression<br>signal 24h | Fold<br>change | P-value | Gene name                                                                       |
|----------------|--------------|-------------------------|--------------------------|----------------|---------|---------------------------------------------------------------------------------|
| Slc12a2        | 1417622_at   | 9.192                   | 9.224                    | 1.020          | 0.7406  | solute carrier family 12, member 2                                              |
| Slc12a2        | 1417623_at   | 5.794                   | 6.072                    | 1.210          | 0.1522  | solute carrier family 12, member 2                                              |
| Slc12a2        | 1448780_at   | 4.787                   | 5.014                    | 1.170          | 0.0699  | solute carrier family 12, member 2                                              |
| Slc12a3        | 1422856_at   | 2.690                   | 2.718                    | 1.020          | 0.7972  | solute carrier family 12, member 3                                              |
| Slc12a4        | 1417446_at   | 3.436                   | 3.372                    | 0.956          | 0.5672  | solute carrier family 12, member 4                                              |
| Slc12a5        | 1425337_at   | 2.246                   | 2.221                    | 0.983          | 0.8376  | solute carrier family 12, member 5                                              |
| Slc12a5        | 1451674_at   | 2.232                   | 2.102                    | 0.914          | 0.2609  | solute carrier family 12, member 5                                              |
| Slc12a6        | 1436989_s_at | 1.366                   | 1.772                    | 1.330          | 0.0453  | solute carrier family 12, member 6                                              |
| Slc12a6        | 1449878_a_at | 5.654                   | 5.950                    | 1.230          | 0.0229  | solute carrier family 12, member 6                                              |
| Slc12a7        | 1418257_at   | 8.032                   | 8.191                    | 1.120          | 0.1105  | solute carrier family 12, member 7                                              |
| Slc12a7        | 1449011_at   | 4.900                   | 4.658                    | 0.845          | 0.3811  | solute carrier family 12, member 7                                              |
| Slc12a8        | 1420334_at   | 5.870                   | 5.994                    | 1.090          | 0.4407  | solute carrier family 12 (potassium/chloride transporters), member 8            |
| Slc12a9        | 1418103_at   | 3.952                   | 4.156                    | 1.150          | 0.1798  | solute carrier family 12 (potassium/chloride transporters), member 9            |
| <b>Slc13</b>   |              |                         |                          |                |         |                                                                                 |
| Slc13a1        | 1431379_a_at | 8.949                   | 8.963                    | 1.010          | 0.9515  | solute carrier family 13 (sodium/sulphate symporters), member 1                 |
| Slc13a2        | 1418857_at   | 9.891                   | 10.548                   | 1.580          | 0.0011  | solute carrier family 13 (sodium-dependent dicarboxylate transporter), member 2 |
| Slc13a3        | 1416560_at   | 2.671                   | 2.666                    | 0.996          | 0.9574  | solute carrier family 13 (sodium-dependent dicarboxylate transporter), member 3 |
| Slc13a3        | 1438377_x_at | 3.822                   | 3.860                    | 1.030          | 0.7634  | solute carrier family 13 (sodium-dependent dicarboxylate transporter), member 3 |
| Slc13a3        | 1439384_at   | 1.496                   | 1.388                    | 0.928          | 0.2547  | solute carrier family 13 (sodium-dependent dicarboxylate transporter), member 3 |
| Slc13a3        | 1439385_x_at | 1.575                   | 1.544                    | 0.979          | 0.8153  | solute carrier family 13 (sodium-dependent dicarboxylate transporter), member 3 |
| <b>Slc14</b>   |              |                         |                          |                |         |                                                                                 |
| Slc14a1        | 1428114_at   | 3.163                   | 3.114                    | 0.966          | 0.6623  | solute carrier family 14 (urea transporter), member 1                           |
| Slc14a1        | 1448640_at   | 2.760                   | 2.789                    | 1.020          | 0.8644  | solute carrier family 14 (urea transporter), member 1                           |
| Slc14a2        | 1425250_a_at | 1.918                   | 1.836                    | 0.945          | 0.3866  | solute carrier family 14 (urea transporter), member 2                           |
| Slc14a2        | 1426109_a_at | 2.403                   | 2.348                    | 0.963          | 0.6275  | solute carrier family 14 (urea transporter), member 2                           |
| <b>Slc15</b>   |              |                         |                          |                |         |                                                                                 |
| Slc15a1        | 1419343_at   | 8.277                   | 8.163                    | 0.924          | 0.4183  | solute carrier family 15 (oligopeptide transporter), member 1                   |
| Slc15a2        | 1417600_at   | 2.780                   | 3.262                    | 1.400          | 0.2628  | solute carrier family 15 (H <sup>+</sup> /peptide transporter), member 2        |
| Slc15a2        | 1424730_a_at | 2.239                   | 2.184                    | 0.962          | 0.6085  | solute carrier family 15 (H <sup>+</sup> /peptide transporter), member 2        |
| Slc15a3        | 1420697_at   | 3.038                   | 2.776                    | 0.834          | 0.0291  | solute carrier family 15, member 3                                              |
| Slc15a4        | 1448385_at   | 5.565                   | 5.396                    | 0.890          | 0.1494  | solute carrier family 15, member 4                                              |
| <b>Slc16</b>   |              |                         |                          |                |         |                                                                                 |
| Slc16a1        | 1415802_at   | 9.027                   | 9.155                    | 1.090          | 0.2613  | solute carrier family 16 (monocarboxylic acid transporters), member 1           |
| Slc16a2        | 1418445_at   | 2.771                   | 2.647                    | 0.918          | 0.2485  | solute carrier family 16 (monocarboxylic acid transporters), member 2           |

| Gene Symbol  | Probe set ID | Expression signal 0h | Expression signal 24h | Fold change | P-value | Gene name                                                                               |
|--------------|--------------|----------------------|-----------------------|-------------|---------|-----------------------------------------------------------------------------------------|
| Slc16a2      | 1418446_at   | 2.128                | 2.070                 | 0.961       | 0.6803  | solute carrier family 16 (monocarboxylic acid transporters), member 2                   |
| Slc16a3      | 1449005_at   | 4.562                | 3.801                 | 0.590       | 0.0058  | solute carrier family 16 (monocarboxylic acid transporters), member 3                   |
| Slc16a4      | 1426082_a_at | 1.267                | 1.285                 | 1.010       | 0.8571  | solute carrier family 16 (monocarboxylic acid transporters), member 4                   |
| Slc16a6      | 1417884_at   | 3.947                | 4.101                 | 1.110       | 0.4650  | solute carrier family 16 (monocarboxylic acid transporters), member 6                   |
| Slc16a7      | 1448502_at   | 2.597                | 2.683                 | 1.060       | 0.5845  | solute carrier family 16 (monocarboxylic acid transporters), member 7                   |
| Slc16a8      | 1420445_at   | 1.710                | 1.803                 | 1.070       | 0.3591  | solute carrier family 16 (monocarboxylic acid transporters), member 8                   |
| Slc16a11     | 1427107_at   | 2.489                | 2.531                 | 1.030       | 0.6491  | solute carrier family 16 (monocarboxylic acid transporters), member 11                  |
| <b>Slc17</b> |              |                      |                       |             |         |                                                                                         |
| Slc17a1      | 1417280_at   | 2.388                | 2.486                 | 1.070       | 0.3902  | solute carrier family 17 (sodium phosphate), member 1                                   |
| Slc17a2      | 1425033_at   | 2.022                | 2.017                 | 0.997       | 0.9601  | solute carrier family 17 (sodium phosphate), member 2                                   |
| Slc17a2      | 1425034_at   | 2.894                | 2.958                 | 1.050       | 0.6130  | solute carrier family 17 (sodium phosphate), member 2                                   |
| Slc17a3      | 1418923_at   | 1.726                | 1.692                 | 0.976       | 0.7650  | solute carrier family 17 (sodium phosphate), member 3                                   |
| Slc17a6      | 1418610_at   | 1.844                | 1.872                 | 1.020       | 0.8214  | solute carrier family 17 (sodium-dependent inorganic phosphate cotransporter), member 6 |
| Slc17a6      | 1428379_at   | 2.711                | 2.668                 | 0.971       | 0.7183  | solute carrier family 17 (sodium-dependent inorganic phosphate cotransporter), member 6 |
| <b>Slc18</b> |              |                      |                       |             |         |                                                                                         |
| Slc18a1      | 1426595_at   | 3.004                | 3.089                 | 1.060       | 0.3988  | solute carrier family 18 (vesicular monoamine), member 1                                |
| Slc18a3      | 1422203_at   | 0.836                | 0.859                 | 1.020       | 0.7866  | solute carrier family 18 (vesicular monoamine), member 3                                |
| <b>Slc19</b> |              |                      |                       |             |         |                                                                                         |
| Slc19a1      | 1420138_at   | 4.352                | 4.449                 | 1.070       | 0.6121  | solute carrier family 19 (sodium/hydrogen exchanger), member 1                          |
| Slc19a1      | 1448132_at   | 3.602                | 3.663                 | 1.040       | 0.7546  | solute carrier family 19 (sodium/hydrogen exchanger), member 1                          |
| Slc19a1      | 1449744_at   | 2.010                | 1.958                 | 0.965       | 0.6073  | solute carrier family 19 (sodium/hydrogen exchanger), member 1                          |
| Slc19a2      | 1417902_at   | 4.748                | 5.024                 | 1.210       | 0.0762  | solute carrier family 19 (thiamine transporter), member 2                               |
| Slc19a2      | 1426117_a_at | 2.625                | 2.873                 | 1.190       | 0.1327  | solute carrier family 19 (thiamine transporter), member 2                               |
| Slc19a3      | 1450348_at   | 2.510                | 2.346                 | 0.893       | 0.1159  | solute carrier family 19 (sodium/hydrogen exchanger), member 3                          |
| <b>Slc20</b> |              |                      |                       |             |         |                                                                                         |
| Slc20a1      | 1438824_at   | 3.469                | 3.339                 | 0.914       | 0.5576  | solute carrier family 20, member 1                                                      |
| Slc20a1      | 1448568_a_at | 7.383                | 6.996                 | 0.764       | 0.2663  | solute carrier family 20, member 1                                                      |
| Slc20a2      | 1434235_at   | 3.372                | 3.580                 | 1.150       | 0.0551  | solute carrier family 20, member 2                                                      |
| Slc20a2      | 1451768_a_at | 3.200                | 3.204                 | 1.000       | 0.9668  | solute carrier family 20, member 2                                                      |
| <b>Slc21</b> |              |                      |                       |             |         |                                                                                         |
| Slco1a1      | 1420379_at   | 2.386                | 2.318                 | 0.954       | 0.4816  | solute carrier organic anion transporter family, member 1a1                             |
| Slco1a1      | 1449844_at   | 3.053                | 3.043                 | 0.993       | 0.9319  | solute carrier organic anion transporter family, member 1a1                             |
| Slco1a4      | 1420405_at   | 2.919                | 2.748                 | 0.888       | 0.1569  | solute carrier organic anion transporter family, member 1a4                             |
| Slco1a5      | 1427403_at   | 3.062                | 3.002                 | 0.959       | 0.5920  | solute carrier organic anion transporter family, member 1a5                             |

| Gene Symbol  | Probe set ID | Expression signal 0h | Expression signal 24h | Fold change | P-value | Gene name                                                              |
|--------------|--------------|----------------------|-----------------------|-------------|---------|------------------------------------------------------------------------|
| Slco1a5      | 1449203_at   | 2.004                | 2.059                 | 1.040       | 0.5941  | solute carrier organic anion transporter family, member 1a5            |
| Slco1a6      | 1419496_at   | 1.777                | 1.708                 | 0.953       | 0.5460  | solute carrier organic anion transporter family, member 1a6            |
| Slco1b2      | 1427825_at   | 2.092                | 2.180                 | 1.060       | 0.4521  | solute carrier organic anion transporter family, member 1b2            |
| Slco1b2      | 1427826_a_at | 2.425                | 2.545                 | 1.090       | 0.3881  | solute carrier organic anion transporter family, member 1b2            |
| Slco1b2      | 1449394_at   | 2.003                | 1.870                 | 0.912       | 0.1548  | solute carrier organic anion transporter family, member 1b2            |
| Slco1b2      | 1452494_s_at | 2.157                | 2.461                 | 1.230       | 0.1039  | solute carrier organic anion transporter family, member 1b2            |
| Slco1b2      | 1452569_at   | 2.320                | 2.129                 | 0.876       | 0.0709  | solute carrier organic anion transporter family, member 1b2            |
| Slco1c1      | 1423343_at   | 1.965                | 2.090                 | 1.090       | 0.4104  | solute carrier organic anion transporter family, member 1c1            |
| Slco2a1      | 1420913_at   | 8.063                | 8.520                 | 1.370       | 0.0023  | solute carrier organic anion transporter family, member 2a1            |
| Slco2a1      | 1420914_at   | 2.514                | 2.583                 | 1.050       | 0.5519  | solute carrier organic anion transporter family, member 2a1            |
| Slco2a1      | 1450032_at   | 6.650                | 6.928                 | 1.210       | 0.0600  | solute carrier organic anion transporter family, member 2a1            |
| Slco3a1      | 1418030_at   | 3.493                | 3.506                 | 1.010       | 0.9293  | solute carrier organic anion transporter family, member 3a1            |
| Slco3a1      | 1434537_at   | 3.067                | 3.172                 | 1.080       | 0.3653  | solute carrier organic anion transporter family, member 3a1            |
| Slco3a1      | 1448918_at   | 3.602                | 3.556                 | 0.968       | 0.7535  | solute carrier organic anion transporter family, member 3a1            |
| Slco5a1      | 1440874_at   | 2.102                | 2.045                 | 0.961       | 0.5039  | solute carrier organic anion transporter family, member 5a1            |
| Slco6b1      | 1419535_at   | 2.037                | 1.864                 | 0.887       | 0.0862  | solute carrier organic anion transporter family, member 6b1            |
| Slco6c1      | 1459092_at   | 3.138                | 3.324                 | 1.140       | 0.1426  | solute carrier organic anion transporter family, member 6c1            |
| <b>Slc22</b> |              |                      |                       |             |         |                                                                        |
| Slc22a1      | 1418118_at   | 8.471                | 8.835                 | 1.290       | 0.0093  | solute carrier family 22 (organic cation transporter), member 1        |
| Slc22a2      | 1419117_at   | 1.551                | 1.551                 | 1.000       | 0.9976  | solute carrier family 22 (organic cation transporter), member 2        |
| Slc22a3      | 1420444_at   | 2.418                | 2.868                 | 1.370       | 0.0019  | solute carrier family 22 (organic cation transporter), member 3        |
| Slc22a4      | 1417639_at   | 4.538                | 4.600                 | 1.040       | 0.6462  | solute carrier family 22 (organic cation transporter), member 4        |
| Slc22a5      | 1421848_at   | 6.375                | 6.589                 | 1.160       | 0.4539  | solute carrier family 22 (organic cation transporter), member 5        |
| Slc22a5      | 1450395_at   | 8.523                | 8.558                 | 1.020       | 0.8513  | solute carrier family 22 (organic cation transporter), member 5        |
| Slc22a6      | 1417072_at   | 2.465                | 2.298                 | 0.891       | 0.1177  | solute carrier family 22 (organic anion transporter), member 6         |
| Slc22a6      | 1438332_at   | 2.794                | 2.793                 | 0.999       | 0.9940  | solute carrier family 22 (organic anion transporter), member 6         |
| Slc22a7      | 1451460_a_at | 2.562                | 2.555                 | 0.995       | 0.9431  | solute carrier family 22 (organic anion transporter), member 7         |
| Slc22a8      | 1416966_at   | 2.361                | 2.364                 | 1.000       | 0.9678  | solute carrier family 22 (organic anion transporter), member 8         |
| Slc22a8      | 1435418_at   | 2.081                | 1.999                 | 0.945       | 0.4236  | solute carrier family 22 (organic anion transporter), member 8         |
| Slc22a12     | 1422897_at   | 2.633                | 2.744                 | 1.080       | 0.4527  | solute carrier family 22 (organic anion/cation transporter), member 12 |
| Slc22a12     | 1422898_s_at | 2.374                | 2.403                 | 1.020       | 0.7495  | solute carrier family 22 (organic anion/cation transporter), member 12 |
| Slc22a13     | 1419129_at   | 1.575                | 1.514                 | 0.958       | 0.5933  | solute carrier family 22 (organic cation transporter), member 13       |
| Slc22a17     | 1448209_a_at | 2.724                | 2.758                 | 1.020       | 0.7732  | solute carrier family 22 (organic cation transporter), member 17       |
| Slc22a18     | 1417809_at   | 7.383                | 7.094                 | 0.818       | 0.0817  | solute carrier family 22 (organic cation transporter), member 18       |

| Gene Symbol  | Probe set ID     | Expression signal 0h | Expression signal 24h | Fold change | P-value | Gene name                                                                                    |
|--------------|------------------|----------------------|-----------------------|-------------|---------|----------------------------------------------------------------------------------------------|
| Slc22a18     | 1427531_a_at     | 4.717                | 4.582                 | 0.910       | 0.3740  | solute carrier family 22 (organic cation transporter), member 18                             |
| Slc22a19     | 1425038_at       | 2.367                | 2.253                 | 0.924       | 0.3890  | solute carrier family 22 (organic anion transporter), member 19                              |
| Slc22a21     | 1449215_at       | 3.706                | 3.860                 | 1.110       | 0.4379  | solute carrier family 22 (organic cation transporter), member 21                             |
| <b>Slc23</b> |                  |                      |                       |             |         |                                                                                              |
| Slc23a1      | 1421912_at       | 6.457                | 6.810                 | 1.280       | 0.0822  | solute carrier family 23 (nucleobase transporters), member 1                                 |
| Slc23a1      | 1450404_at       | 3.184                | 3.178                 | 0.996       | 0.9499  | solute carrier family 23 (nucleobase transporters), member 1                                 |
| Slc23a2      | 1417329_at       | 6.400                | 6.583                 | 1.130       | 0.0745  | solute carrier family 23 (nucleobase transporters), member 2                                 |
| Slc23a2      | 1417330_at       | 2.974                | 3.101                 | 1.090       | 0.4692  | solute carrier family 23 (nucleobase transporters), member 2                                 |
| Slc23a3      | 1460042_at       | 1.942                | 2.074                 | 1.100       | 0.1670  | solute carrier family 23 (nucleobase transporters), member 3                                 |
| <b>Slc24</b> |                  |                      |                       |             |         |                                                                                              |
| Slc24a1      | 1451647_at       | 1.973                | 1.923                 | 0.966       | 0.5997  | solute carrier family 24 (sodium/potassium/calcium exchanger), member 1                      |
| Slc24a3      | 1424308_at       | 5.084                | 4.725                 | 0.779       | 0.2444  | solute carrier family 24 (sodium/potassium/calcium exchanger), member 3                      |
| Slc24a6      | 1417811_at       | 3.043                | 3.042                 | 0.999       | 0.9913  | solute carrier family 24 (sodium/potassium/calcium exchanger), member 6                      |
| <b>Slc25</b> |                  |                      |                       |             |         |                                                                                              |
| Slc25a2      | 1425013_at       | 1.846                | 1.746                 | 0.933       | 0.3231  | solute carrier family 25 (mitochondrial carrier, ornithine transporter) member 2             |
| Slc25a3      | 1416300_a_at     | 11.725               | 11.686                | 0.973       | 0.6842  | solute carrier family 25 (mitochondrial carrier, phosphate carrier), member 3                |
| Slc25a4      | 1424562_a_at     | 9.173                | 9.102                 | 0.951       | 0.6075  | solute carrier family 25 (mitochondrial carrier, adenine nucleotide translocator), member 4  |
| Slc25a4      | 1424563_at       | 1.748                | 1.741                 | 0.995       | 0.9506  | solute carrier family 25 (mitochondrial carrier, adenine nucleotide translocator), member 4  |
| Slc25a4      | 1434897_a_at     | 7.625                | 7.756                 | 1.100       | 0.4203  | solute carrier family 25 (mitochondrial carrier, adenine nucleotide translocator), member 4  |
| Slc25a4      | 1455069_x_at     | 8.560                | 8.532                 | 0.981       | 0.8589  | solute carrier family 25 (mitochondrial carrier, adenine nucleotide translocator), member 4  |
| Slc25a5      | 1423772_x_at     | 12.276               | 12.327                | 1.040       | 0.5806  | solute carrier family 25 (mitochondrial carrier, adenine nucleotide translocator), member 5  |
| Slc25a5      | 1434801_x_at     | 11.458               | 11.504                | 1.030       | 0.6144  | solute carrier family 25 (mitochondrial carrier, adenine nucleotide translocator), member 5  |
| Slc25a5      | 1436874_x_at     | 12.416               | 12.581                | 1.120       | 0.1053  | solute carrier family 25 (mitochondrial carrier, adenine nucleotide translocator), member 5  |
| Slc25a5      | 1438360_x_at     | 10.020               | 10.255                | 1.180       | 0.1472  | solute carrier family 25 (mitochondrial carrier, adenine nucleotide translocator), member 5  |
| Slc25a5      | /// 1438545_at   | 8.802                | 9.016                 | 1.160       | 0.0429  | solute carrier family 25 (mitochondrial carrier, adenine nucleotide translocator), member 5  |
| Slc25a5      | /// 1438546_x_at | 9.826                | 10.010                | 1.140       | 0.0566  | solute carrier family 25 (mitochondrial carrier, adenine nucleotide translocator), member 5  |
| Slc25a5      | /// 1438922_x_at | 10.062               | 10.346                | 1.220       | 0.1703  | solute carrier family 25 (mitochondrial carrier, adenine nucleotide translocator), member 5  |
| Slc25a5      | /// 1430542_a_at | 12.209               | 12.334                | 1.090       | 0.2471  | solute carrier family 25 (mitochondrial carrier, adenine nucleotide translocator), member 5  |
| Slc25a10     | 1416954_at       | 9.082                | 8.847                 | 0.850       | 0.1175  | solute carrier family 25 (mitochondrial carrier, dicarboxylate transporter), member 10       |
| Slc25a10     | 1416955_at       | 7.251                | 6.922                 | 0.796       | 0.0850  | solute carrier family 25 (mitochondrial carrier, dicarboxylate transporter), member 10       |
| Slc25a11     | 1426586_at       | 7.792                | 7.821                 | 1.020       | 0.7918  | solute carrier family 25 (mitochondrial carrier oxoglutarate carrier), member 11             |
| Slc25a13     | 1449481_at       | 5.089                | 5.014                 | 0.949       | 0.5527  | solute carrier family 25 (mitochondrial carrier, adenine nucleotide translocator), member 13 |
| Slc25a14     | 1417154_at       | 3.762                | 3.755                 | 0.995       | 0.9441  | solute carrier family 25 (mitochondrial carrier, brain), member 14                           |
| Slc25a15     | 1420966_at       | 9.073                | 8.878                 | 0.874       | 0.2057  | solute carrier family 25 (mitochondrial carrier ornithine transporter), member 15            |

| Gene Symbol  | Probe set ID | Expression signal 0h | Expression signal 24h | Fold change | P-value | Gene name                                                                                   |
|--------------|--------------|----------------------|-----------------------|-------------|---------|---------------------------------------------------------------------------------------------|
| Slc25a15     | 1420967_at   | 10.513               | 10.563                | 1.040       | 0.6257  | solute carrier family 25 (mitochondrial carrier ornithine transporter), member 15           |
| Slc25a17     | 1424912_at   | 3.857                | 4.121                 | 1.200       | 0.1346  | solute carrier family 25 (mitochondrial carrier, peroxisomal membrane protein), member 17   |
| Slc25a17     | 1450353_at   | 1.815                | 1.689                 | 0.916       | 0.2397  | solute carrier family 25 (mitochondrial carrier, peroxisomal membrane protein), member 17   |
| Slc25a19     | 1424316_at   | 2.202                | 2.082                 | 0.920       | 0.2265  | solute carrier family 25 (mitochondrial deoxynucleotide carrier), member 19                 |
| Slc25a19     | 1424317_at   | 3.118                | 2.883                 | 0.850       | 0.1308  | solute carrier family 25 (mitochondrial deoxynucleotide carrier), member 19                 |
| Slc25a19     | 1437459_x_at | 2.652                | 2.409                 | 0.845       | 0.1006  | solute carrier family 25 (mitochondrial deoxynucleotide carrier), member 19                 |
| Slc25a20     | 1423108_at   | 8.971                | 9.498                 | 1.440       | 0.0002  | solute carrier family 25 (mitochondrial carnitine/acylcarnitine translocase), member 20     |
| Slc25a20     | 1423109_s_at | 7.664                | 8.186                 | 1.440       | 0.0019  | solute carrier family 25 (mitochondrial carnitine/acylcarnitine translocase), member 20     |
| Slc25a22     | 1452653_at   | 8.311                | 8.415                 | 1.070       | 0.4250  | solute carrier family 25 (mitochondrial carrier, glutamate), member 22                      |
| Slc25a23     | 1419045_at   | 3.626                | 3.928                 | 1.230       | 0.0086  | solute carrier family 25 (mitochondrial carrier, phosphate carrier), member 23              |
| Slc25a24     | 1427483_at   | 6.994                | 7.260                 | 1.200       | 0.0305  | solute carrier family 25 (mitochondrial carrier, phosphate carrier), member 24              |
| Slc25a25     | 1424735_at   | 4.804                | 4.748                 | 0.962       | 0.5863  | solute carrier family 25 (mitochondrial carrier, phosphate carrier), member 25              |
| Slc25a26     | 1428929_s_at | 3.783                | 3.714                 | 0.954       | 0.4403  | solute carrier family 25 (mitochondrial carrier, phosphate carrier), member 26              |
| Slc25a26     | 1453886_a_at | 2.068                | 2.099                 | 1.020       | 0.7709  | solute carrier family 25 (mitochondrial carrier, phosphate carrier), member 26              |
| Slc25a28     | 1424776_a_at | 6.754                | 7.270                 | 1.430       | 0.0018  | solute carrier family 25, member 28                                                         |
| Slc25a29     | 1423979_a_at | 3.589                | 3.409                 | 0.883       | 0.0657  | solute carrier family 25 (mitochondrial carrier, palmitoylcarnitine transporter), member 29 |
| Slc25a29     | 1423980_at   | 2.457                | 2.214                 | 0.845       | 0.0639  | solute carrier family 25 (mitochondrial carrier, palmitoylcarnitine transporter), member 29 |
| Slc25a29     | 1423981_x_at | 1.981                | 1.967                 | 0.990       | 0.8758  | solute carrier family 25 (mitochondrial carrier, palmitoylcarnitine transporter), member 29 |
| Slc25a29     | 1438187_at   | 1.835                | 1.852                 | 1.010       | 0.8551  | solute carrier family 25 (mitochondrial carrier, palmitoylcarnitine transporter), member 29 |
| Slc25a29     | 1438188_x_at | 1.833                | 1.743                 | 0.940       | 0.4402  | solute carrier family 25 (mitochondrial carrier, palmitoylcarnitine transporter), member 29 |
| Slc25a30     | 1420835_at   | 2.752                | 3.129                 | 1.300       | 0.0618  | solute carrier family 25, member 30                                                         |
| Slc25a30     | 1420836_at   | 2.863                | 3.534                 | 1.590       | 0.0084  | solute carrier family 25, member 30                                                         |
| Slc25a30     | 1425948_a_at | 1.735                | 1.815                 | 1.060       | 0.5149  | solute carrier family 25, member 30                                                         |
| Slc25a30     | 1425949_at   | 1.988                | 1.970                 | 0.988       | 0.8380  | solute carrier family 25, member 30                                                         |
| Slc25a30     | 1450018_s_at | 3.218                | 3.449                 | 1.170       | 0.0364  | solute carrier family 25, member 30                                                         |
| Slc25a35     | 1451489_at   | 2.930                | 2.750                 | 0.882       | 0.1513  | solute carrier family 25, member 35                                                         |
| Slc25a36     | 1419656_at   | 6.266                | 7.058                 | 1.730       | 0.0002  | solute carrier family 25, member 36                                                         |
| Slc25a36     | 1419657_a_at | 9.097                | 9.703                 | 1.520       | 0.0007  | solute carrier family 25, member 36                                                         |
| Slc25a37     | 1417750_a_at | 7.181                | 7.266                 | 1.060       | 0.3635  | solute carrier family 25, member 37                                                         |
| <b>Slc26</b> |              |                      |                       |             |         |                                                                                             |
| Slc26a1      | 1451239_a_at | 2.037                | 2.206                 | 1.120       | 0.0808  | solute carrier family 26 (sulfate transporter), member 1                                    |
| Slc26a2      | 1421145_at   | 5.368                | 5.865                 | 1.410       | 0.0028  | solute carrier family 26 (sulfate transporter), member 2                                    |
| Slc26a3      | 1421445_at   | 8.504                | 8.737                 | 1.180       | 0.1933  | solute carrier family 26, member 3                                                          |
| Slc26a3      | 1427547_a_at | 8.270                | 8.569                 | 1.230       | 0.0204  | solute carrier family 26, member 3                                                          |

| Gene<br>Symbol | Probe set ID | Expression<br>signal 0h | Expression<br>signal 24h | Fold<br>change | P-value | Gene name                                                                  |
|----------------|--------------|-------------------------|--------------------------|----------------|---------|----------------------------------------------------------------------------|
| Slc26a4        | 1419725_at   | 1.802                   | 1.761                    | 0.972          | 0.7329  | solute carrier family 26, member 4                                         |
| Slc26a5        | 1421725_at   | 2.378                   | 2.484                    | 1.080          | 0.2517  | solute carrier family 26, member 5                                         |
| Slc26a6        | 1416275_at   | 9.989                   | 10.218                   | 1.170          | 0.1031  | solute carrier family 26, member 6                                         |
| Slc26a7        | 1425841_at   | 1.982                   | 2.004                    | 1.020          | 0.8632  | solute carrier family 26, member 7                                         |
| Slc26a8        | 1425915_at   | 2.857                   | 2.856                    | 0.999          | 0.9909  | solute carrier family 26, member 8                                         |
| <b>Slc27</b>   |              |                         |                          |                |         |                                                                            |
| Slc27a1        | 1422811_at   | 2.629                   | 2.672                    | 1.030          | 0.6415  | solute carrier family 27 (fatty acid transporter), member 1                |
| Slc27a2        | 1416316_at   | 10.095                  | 10.774                   | 1.600          | 0.0003  | solute carrier family 27 (fatty acid transporter), member 2                |
| Slc27a3        | 1427180_at   | 1.381                   | 1.345                    | 0.975          | 0.6676  | solute carrier family 27 (fatty acid transporter), member 3                |
| Slc27a4        | 1424441_at   | 10.724                  | 10.411                   | 0.805          | 0.0170  | solute carrier family 27 (fatty acid transporter), member 4                |
| Slc27a5        | 1449112_at   | 2.270                   | 2.188                    | 0.945          | 0.3655  | solute carrier family 27 (fatty acid transporter), member 5                |
| <b>Slc28</b>   |              |                         |                          |                |         |                                                                            |
| Slc28a2        | 1450639_at   | 10.296                  | 9.777                    | 0.698          | 0.0134  | solute carrier family 28 (sodium-coupled nucleoside transporter), member 2 |
| Slc28a3        | 1419570_at   | 3.347                   | 3.230                    | 0.922          | 0.2998  | solute carrier family 28 (sodium-coupled nucleoside transporter), member 3 |
| Slc28a3        | 1419571_at   | 3.449                   | 3.340                    | 0.928          | 0.2549  | solute carrier family 28 (sodium-coupled nucleoside transporter), member 3 |
| <b>Slc29</b>   |              |                         |                          |                |         |                                                                            |
| Slc29a1        | 1451782_a_at | 2.794                   | 2.805                    | 1.010          | 0.9252  | solute carrier family 29 (nucleoside transporters), member 1               |
| Slc29a2        | 1448257_at   | 1.549                   | 1.606                    | 1.040          | 0.6139  | solute carrier family 29 (nucleoside transporters), member 2               |
| Slc29a3        | 1451013_at   | 2.188                   | 1.988                    | 0.871          | 0.1614  | solute carrier family 29 (nucleoside transporters), member 3               |
| Slc29a3        | 1455731_at   | 3.589                   | 3.840                    | 1.190          | 0.0724  | solute carrier family 29 (nucleoside transporters), member 3               |
| Slc29a4        | 1424900_at   | 2.232                   | 2.201                    | 0.979          | 0.7453  | solute carrier family 29 (nucleoside transporters), member 4               |
| <b>Slc30</b>   |              |                         |                          |                |         |                                                                            |
| Slc30a1        | 1422786_at   | 4.530                   | 4.479                    | 0.965          | 0.7722  | solute carrier family 30 (zinc transporter), member 1                      |
| Slc30a2        | 1427339_at   | 5.160                   | 6.079                    | 1.890          | 0.0002  | solute carrier family 30 (zinc transporter), member 2                      |
| Slc30a3        | 1460654_at   | 3.166                   | 3.086                    | 0.946          | 0.4602  | solute carrier family 30 (zinc transporter), member 3                      |
| Slc30a4        | 1418843_at   | 9.259                   | 9.448                    | 1.140          | 0.2072  | solute carrier family 30 (zinc transporter), member 4                      |
| Slc30a5        | 1422497_at   | 8.557                   | 8.492                    | 0.956          | 0.4683  | solute carrier family 30 (zinc transporter), member 5                      |
| Slc30a6        | 1424241_at   | 6.856                   | 6.981                    | 1.090          | 0.2729  | solute carrier family 30 (zinc transporter), member 6                      |
| Slc30a7        | 1450697_at   | 4.805                   | 4.778                    | 0.982          | 0.8909  | solute carrier family 30 (zinc transporter), member 7                      |
| Slc30a9        | 1426668_at   | 5.339                   | 5.249                    | 0.940          | 0.5496  | solute carrier family 30 (zinc transporter), member 9                      |
| <b>Slc31</b>   |              |                         |                          |                |         |                                                                            |
| Slc31a1        | 1433750_at   | 7.636                   | 7.727                    | 1.060          | 0.3415  | solute carrier family 31, member 1                                         |
| Slc31a1        | 1455285_at   | 7.848                   | 7.686                    | 0.894          | 0.1249  | solute carrier family 31, member 1                                         |
| Slc31a2        | 1416654_at   | 3.289                   | 3.249                    | 0.973          | 0.6757  | solute carrier family 31, member 2                                         |

| Gene Symbol  | Probe set ID | Expression signal 0h | Expression signal 24h | Fold change | P-value | Gene name                                                                             |
|--------------|--------------|----------------------|-----------------------|-------------|---------|---------------------------------------------------------------------------------------|
| Slc31a2      | 1453721_a_at | 2.789                | 2.770                 | 0.988       | 0.8381  | solute carrier family 31, member 2                                                    |
| <b>Slc32</b> |              |                      |                       |             |         |                                                                                       |
| Slc32a1      | 1456457_at   | 2.744                | 2.885                 | 1.100       | 0.1773  | solute carrier family 32 (GABA vesicular transporter), member 1                       |
| Slc32a1      | 1422756_at   | 1.669                | 1.709                 | 1.030       | 0.7797  | solute carrier family 32 (GABA vesicular transporter), member 1                       |
| <b>Slc33</b> |              |                      |                       |             |         |                                                                                       |
| Slc33a1      | 1423621_a_at | 5.345                | 5.280                 | 0.955       | 0.7053  | solute carrier family 33 (acetyl-CoA transporter), member 1                           |
| <b>Slc34</b> |              |                      |                       |             |         |                                                                                       |
| Slc34a1      | 1423279_at   | 1.651                | 1.814                 | 1.120       | 0.2528  | solute carrier family 34 (sodium phosphate), member 1                                 |
| Slc34a2      | 1416854_at   | 8.784                | 8.605                 | 0.884       | 0.6011  | solute carrier family 34 (sodium phosphate), member 2                                 |
| <b>Slc35</b> |              |                      |                       |             |         |                                                                                       |
| Slc35a1      | 1417538_at   | 4.636                | 4.422                 | 0.862       | 0.2651  | solute carrier family 35 (CMP-sialic acid transporter), member 1                      |
| Slc35a1      | 1417539_at   | 3.599                | 3.617                 | 1.010       | 0.9294  | solute carrier family 35 (CMP-sialic acid transporter), member 1                      |
| Slc35a2      | 1422827_x_at | 4.248                | 3.927                 | 0.801       | 0.0376  | solute carrier family 35 (UDP-galactose transporter), member 2                        |
| Slc35a2      | 1432533_a_at | 4.412                | 4.275                 | 0.909       | 0.3076  | solute carrier family 35 (UDP-galactose transporter), member 2                        |
| Slc35a2      | 1436664_a_at | 4.585                | 4.336                 | 0.842       | 0.0725  | solute carrier family 35 (UDP-galactose transporter), member 2                        |
| Slc35a2      | 1439433_a_at | 6.581                | 6.365                 | 0.861       | 0.1797  | solute carrier family 35 (UDP-galactose transporter), member 2                        |
| Slc35a3      | 1424579_at   | 5.896                | 5.964                 | 1.050       | 0.6375  | solute carrier family 35 (UDP-N-acetylglucosamine (UDP-GlcNAc) transporter), member 3 |
| Slc35a3      | 1424580_at   | 5.181                | 5.198                 | 1.010       | 0.8918  | solute carrier family 35 (UDP-N-acetylglucosamine (UDP-GlcNAc) transporter), member 3 |
| Slc35a4      | 1416110_at   | 6.297                | 6.098                 | 0.871       | 0.0980  | solute carrier family 35, member A4                                                   |
| Slc35a4      | 1456013_x_at | 6.770                | 6.665                 | 0.930       | 0.4257  | solute carrier family 35, member A4                                                   |
| Slc35a5      | 1419970_at   | 2.748                | 2.807                 | 1.040       | 0.6650  | solute carrier family 35, member A5                                                   |
| Slc35a5      | 1419971_s_at | 7.175                | 6.815                 | 0.779       | 0.0986  | solute carrier family 35, member A5                                                   |
| Slc35a5      | 1423457_at   | 3.726                | 3.660                 | 0.956       | 0.4840  | solute carrier family 35, member A5                                                   |
| Slc35a5      | 1423458_at   | 2.296                | 2.175                 | 0.920       | 0.2457  | solute carrier family 35, member A5                                                   |
| Slc35b1      | 1448769_at   | 9.820                | 9.865                 | 1.030       | 0.6642  | solute carrier family 35, member B1                                                   |
| Slc35b2      | 1423927_at   | 5.682                | 5.696                 | 1.010       | 0.9114  | solute carrier family 35, member B2                                                   |
| Slc35b3      | 1448937_at   | 7.262                | 7.852                 | 1.510       | 0.0005  | solute carrier family 35, member B3                                                   |
| Slc35b4      | 1416548_at   | 2.430                | 2.347                 | 0.944       | 0.4464  | solute carrier family 35, member B4                                                   |
| Slc35b4      | 1416549_at   | 2.702                | 2.506                 | 0.873       | 0.1315  | solute carrier family 35, member B4                                                   |
| Slc35b4      | 1416550_at   | 2.908                | 2.816                 | 0.938       | 0.3653  | solute carrier family 35, member B4                                                   |
| Slc35c1      | 1452139_at   | 7.603                | 6.958                 | 0.639       | 0.0052  | solute carrier family 35, member C1                                                   |
| Slc35c2      | 1420054_s_at | 7.326                | 7.583                 | 1.200       | 0.0948  | solute carrier family 35, member C2                                                   |
| Slc35c2      | 1420055_at   | 1.495                | 1.709                 | 1.160       | 0.0794  | solute carrier family 35, member C2                                                   |
| Slc35c2      | 1460731_at   | 4.339                | 4.469                 | 1.090       | 0.5317  | solute carrier family 35, member C2                                                   |

| Gene<br>Symbol | Probe set ID | Expression<br>signal 0h | Expression<br>signal 24h | Fold<br>change | P-value | Gene name                                                             |
|----------------|--------------|-------------------------|--------------------------|----------------|---------|-----------------------------------------------------------------------|
| Slc35e4        | 1434167_at   | 2.753                   | 2.716                    | 0.974          | 0.7605  | solute carrier family 35, member E4                                   |
| Slc35e4        | 1436693_x_at | 2.623                   | 2.636                    | 1.010          | 0.8752  | solute carrier family 35, member E4                                   |
| Slc35f4        | 1452263_at   | 2.109                   | 2.070                    | 0.973          | 0.7214  | solute carrier family 35, member F4                                   |
| Slc35f5        | 1452059_at   | 8.284                   | 8.461                    | 1.130          | 0.1657  | solute carrier family 35, member F5                                   |
| <b>Slc36</b>   |              |                         |                          |                |         |                                                                       |
| <b>Slc37</b>   |              |                         |                          |                |         |                                                                       |
| Slc37a1        | 1426601_at   | 6.262                   | 6.434                    | 1.130          | 0.4453  | solute carrier family 37 (glycerol-3-phosphate transporter), member 1 |
| Slc37a2        | 1452492_a_at | 2.721                   | 2.633                    | 0.940          | 0.3533  | solute carrier family 37 (glycerol-3-phosphate transporter), member 2 |
| Slc37a3        | 1424920_at   | 3.415                   | 3.476                    | 1.040          | 0.6457  | solute carrier family 37 (glycerol-3-phosphate transporter), member 3 |
| Slc37a3        | 1453915_a_at | 4.589                   | 4.689                    | 1.070          | 0.4139  | solute carrier family 37 (glycerol-3-phosphate transporter), member 3 |
| Slc37a4        | 1417042_at   | 7.127                   | 8.317                    | 2.280          | 0.0010  | solute carrier family 37 (glycerol-6-phosphate transporter), member 4 |
| <b>Slc38</b>   |              |                         |                          |                |         |                                                                       |
| Slc38a1        | 1415903_at   | 3.150                   | 3.020                    | 0.914          | 0.3204  | solute carrier family 38, member 1                                    |
| Slc38a2        | 1426722_at   | 8.104                   | 8.473                    | 1.290          | 0.0100  | solute carrier family 38, member 2                                    |
| Slc38a3        | 1418706_at   | 2.490                   | 2.477                    | 0.991          | 0.8918  | solute carrier family 38, member 3                                    |
| Slc38a4        | 1428111_at   | 2.330                   | 2.348                    | 1.010          | 0.8557  | solute carrier family 38, member 4                                    |
| Slc38a4        | 1448889_at   | 1.171                   | 1.228                    | 1.040          | 0.5545  | solute carrier family 38, member 4                                    |
| Slc38a5        | 1454622_at   | 1.229                   | 1.438                    | 1.160          | 0.0399  | solute carrier family 38, member 5                                    |
| <b>Slc39</b>   |              |                         |                          |                |         |                                                                       |
| Slc39a1        | 1424424_at   | 7.847                   | 7.699                    | 0.902          | 0.5323  | solute carrier family 39 (zinc transporter), member 1                 |
| Slc39a3        | 1417881_at   | 3.898                   | 3.874                    | 0.983          | 0.8474  | solute carrier family 39 (zinc transporter), member 3                 |
| Slc39a3        | 1417882_at   | 2.939                   | 3.031                    | 1.070          | 0.4517  | solute carrier family 39 (zinc transporter), member 3                 |
| Slc39a4        | 1451139_at   | 9.600                   | 8.367                    | 0.426          | 0.0003  | solute carrier family 39 (zinc transporter), member 4                 |
| Slc39a6        | 1424674_at   | 5.200                   | 4.974                    | 0.855          | 0.1283  | solute carrier family 39 (metal ion transporter), member 6            |
| Slc39a6        | 1424675_at   | 2.527                   | 2.489                    | 0.974          | 0.7841  | solute carrier family 39 (metal ion transporter), member 6            |
| Slc39a7        | 1416949_s_at | 8.689                   | 8.672                    | 0.988          | 0.8731  | solute carrier family 39 (zinc transporter), member 7                 |
| Slc39a8        | 1416832_at   | 3.854                   | 4.702                    | 1.800          | 0.0229  | solute carrier family 39 (metal ion transporter), member 8            |
| Slc39a8        | 1448482_at   | 2.113                   | 2.578                    | 1.380          | 0.1231  | solute carrier family 39 (metal ion transporter), member 8            |
| Slc39a9        | 1421249_at   | 1.444                   | 1.464                    | 1.010          | 0.8612  | solute carrier family 39 (zinc transporter), member 9                 |
| Slc39a9        | 1421250_at   | 2.626                   | 2.535                    | 0.939          | 0.4517  | solute carrier family 39 (zinc transporter), member 9                 |
| Slc39a9        | 1452765_at   | 7.789                   | 7.798                    | 1.010          | 0.9472  | solute carrier family 39 (zinc transporter), member 9                 |
| Slc39a11       | 1424905_a_at | 4.948                   | 4.905                    | 0.971          | 0.8051  | solute carrier family 39 (metal ion transporter), member 11           |
| Slc39a13       | 1423926_at   | 2.720                   | 2.711                    | 0.994          | 0.9146  | solute carrier family 39 (metal ion transporter), member 13           |
| Slc39a14       | 1425649_at   | 3.923                   | 3.838                    | 0.943          | 0.6251  | solute carrier family 39 (zinc transporter), member 14                |

| Gene Symbol  | Probe set ID | Expression signal 0h | Expression signal 24h | Fold change | P-value | Gene name                                                       |
|--------------|--------------|----------------------|-----------------------|-------------|---------|-----------------------------------------------------------------|
| Slc39a14     | 1427035_at   | 7.352                | 7.724                 | 1.290       | 0.0628  | solute carrier family 39 (zinc transporter), member 14          |
| <b>Slc40</b> |              |                      |                       |             |         |                                                                 |
| Slc40a1      | 1417061_at   | 8.424                | 7.706                 | 0.608       | 0.0099  | solute carrier family 40 (iron-regulated transporter), member 1 |
| Slc40a1      | 1448566_at   | 8.287                | 7.315                 | 0.510       | 0.0084  | solute carrier family 40 (iron-regulated transporter), member 1 |
| <b>Slc41</b> |              |                      |                       |             |         |                                                                 |
| Slc41a1      | 1460565_at   | 3.743                | 3.732                 | 0.992       | 0.8974  | solute carrier family 41, member 1                              |
| Slc41a2      | 1452445_at   | 7.205                | 7.047                 | 0.897       | 0.2884  | solute carrier family 41, member 2                              |
| Slc41a3      | 1425439_a_at | 3.260                | 3.359                 | 1.070       | 0.2920  | solute carrier family 41, member 3                              |
| Slc41a3      | 1425440_x_at | 2.697                | 2.802                 | 1.080       | 0.4621  | solute carrier family 41, member 3                              |
| Slc41a3      | 1451707_s_at | 2.202                | 2.413                 | 1.160       | 0.0367  | solute carrier family 41, member 3                              |
| <b>Slc43</b> |              |                      |                       |             |         |                                                                 |
| Slc43a3      | 1422788_at   | 3.968                | 4.488                 | 1.430       | 0.0029  | solute carrier family 43, member 3                              |
| <b>Slc44</b> |              |                      |                       |             |         |                                                                 |
| Slc44a1      | 1423865_at   | 4.390                | 4.561                 | 1.130       | 0.0947  | solute carrier family 44, member 1                              |
| Slc44a2      | 1428065_at   | 3.968                | 3.918                 | 0.966       | 0.7477  | solute carrier family 44, member 2                              |
| Slc44a2      | 1438559_x_at | 5.096                | 5.217                 | 1.090       | 0.4107  | solute carrier family 44, member 2                              |
| Slc44a2      | 1438860_a_at | 3.895                | 3.799                 | 0.935       | 0.4120  | solute carrier family 44, member 2                              |
| Slc44a3      | 1425109_at   | 5.371                | 5.277                 | 0.937       | 0.5646  | solute carrier family 44, member 3                              |
| Slc44a4      | 1416596_at   | 8.626                | 8.875                 | 1.190       | 0.0484  | solute carrier family 44, member 4                              |
| <b>Slc45</b> |              |                      |                       |             |         |                                                                 |
| Slc45a2      | 1437430_at   | 2.332                | 2.280                 | 0.964       | 0.5679  | solute carrier family 45, member 2                              |
| Slc45a2      | 1451055_at   | 1.517                | 1.558                 | 1.030       | 0.7098  | solute carrier family 45, member 2                              |
| Slc45a3      | 1426663_s_at | 1.700                | 1.479                 | 0.858       | 0.0708  | solute carrier family 45, member 3                              |
| Slc45a3      | 1426664_x_at | 3.329                | 3.137                 | 0.875       | 0.0591  | solute carrier family 45, member 3                              |
